# Supplementary material for: Susceptibility Testing by Volatile Organic Compound Detection Direct from Positive Blood Cultures: A Proof-of-Principle Laboratory Study
Source: MDPI journal article supplement (doi:10.3390/antibiotics11060705), 2022-05-24
Supplement: s1 [file antibiotics-1698671-supplementary.pdf › antibiotics-1698671-supplementary.pdf]

---

## Supplementary Materials

**Table S1.** Samples excluded based on isolated micro-organisms other than *Enterobacterales* spp, *Staphylococcus* spp or *Enterococcus* spp.

*Achromobacter xylosoxidans* (3)

*Acinetobacter baumannii* (1)

*Acinetobacter* spp. (1)

*Haemophilus influenzae* (1)

*Micrococcus luteus* (2)

*Neisseria meningitidis* (1)

*Pseudomonas aeruginosa* (4)

*Streptococcus agalactiae* (1)

*Streptococcus constellatus* (milleri gr.) (1)

*Streptococcus dysgalactiae* (1)

*Stenotrophomonas maltophilia* (1)

*Streptococcus milleri* group (1)

*Streptococcus vestibularis* (salivarius gr.) (1)

**Table S2.** Specifications of errors occurred.

|                                                      |                            |
|------------------------------------------------------|----------------------------|
| <b>Preparation errors SpecifAST®</b>                 |                            |
| Leaks                                                | 9 b/d in 4 blood cultures  |
| Bacterial contamination                              | 2 b/d in 1 blood culture   |
| Incorrect number of antibiotic dilutions             | 2 b/d in 2 blood cultures  |
| <b>Technical errors SpecifAST®</b>                   |                            |
| No signal                                            | 12 b/d in 4 blood cultures |
| Software problem                                     | 11 b/d in 4 blood cultures |
| Instrument error                                     | 3 b/d in 1 blood culture   |
| <b>No bacterial growth in SpecifAST® and VITEK®2</b> | 2 b/d in 1 blood culture   |

b/d: bug/drug combinations.

**Table S3.** Minimal inhibitory concentrations of *Enterobacterales*, *Staphylococcus* and *Enterococcus* spp. and corresponding tested antimicrobials measured by SpecifAST® and VITEK®2.

**A.** Ciprofloxacin, *Enterobacterales* spp.

|            |              | VITEK®2     |     |           |   |    |       |
|------------|--------------|-------------|-----|-----------|---|----|-------|
|            |              | Susceptible | ATU | Resistant |   |    |       |
|            |              | ≤0.25       | 0.5 | 1         | 2 | >2 | Total |
| SpecifAST® | ≤0.25        | 35          | 0   | 0         | 0 | 0  | 35    |
|            | 0.5          | 0           | 0   | 0         | 0 | 0  | 0     |
|            | 1            | 0           | 0   | 0         | 0 | 0  | 0     |
|            | 2            | 0           | 0   | 0         | 0 | 0  | 0     |
|            | >2           | 0           | 0   | 0         | 0 | 9  | 9     |
|            | <b>Total</b> | 35          | 0   | 0         | 0 | 9  | 44    |

**B.** Cefotaxime, *Enterobacterales* spp.

|            |              | VITEK®2     |     |   |   |           |   |    |    |     |       |
|------------|--------------|-------------|-----|---|---|-----------|---|----|----|-----|-------|
|            |              | Susceptible |     |   | I | Resistant |   |    |    |     |       |
|            |              | ≤0.25       | 0.5 | 1 | 2 | 4         | 8 | 16 | 32 | >32 | Total |
| SpecifAST® | ≤0.25        | 37          | 0   | 0 | 0 | 0         | 0 | 0  | 0  | 0   | 37    |
|            | 0.5          | 0           | 1   | 0 | 0 | 0         | 0 | 0  | 0  | 0   | 1     |
|            | 1            | 0           | 0   | 0 | 0 | 0         | 0 | 0  | 0  | 0   | 0     |
|            | 2            | 0           | 0   | 0 | 0 | 0         | 0 | 0  | 0  | 0   | 0     |
|            | 4            | 0           | 0   | 0 | 0 | 0         | 0 | 0  | 0  | 0   | 0     |
|            | 8            | 0           | 0   | 0 | 0 | 0         | 0 | 0  | 0  | 0   | 0     |
|            | 16           | 0           | 0   | 0 | 0 | 1         | 0 | 0  | 0  | 0   | 1     |
|            | 32           | 0           | 0   | 0 | 0 | 0         | 0 | 1  | 0  | 1   | 2     |
|            | >32          | 0           | 0   | 0 | 0 | 0         | 0 | 1  | 0  | 3   | 4     |
|            | <b>Total</b> | 37          | 1   | 0 | 0 | 1         | 0 | 2  | 0  | 4   | 45    |

**C.** Meropenem, *Enterobacterales* spp.

|            |              | VITEK®2     |     |   |   |   |   |           |       |
|------------|--------------|-------------|-----|---|---|---|---|-----------|-------|
|            |              | Susceptible |     |   |   | I |   | Resistant |       |
|            |              | ≤0.25       | 0.5 | 1 | 2 | 4 | 8 | >8        | Total |
| SpecifAST® | ≤0.25        | 43          | 0   | 0 | 0 | 0 | 0 | 0         | 43    |
|            | 0.5          | 1           | 0   | 0 | 0 | 0 | 0 | 0         | 1     |
|            | 1            | 1           | 0   | 0 | 0 | 0 | 0 | 0         | 1     |
|            | 2            | 0           | 0   | 0 | 0 | 0 | 0 | 0         | 0     |
|            | 4            | 0           | 0   | 0 | 0 | 0 | 0 | 0         | 0     |
|            | 8            | 0           | 0   | 0 | 0 | 0 | 0 | 0         | 0     |
|            | >8           | 0           | 0   | 0 | 0 | 0 | 0 | 0         | 0     |
|            | <b>Total</b> | 45          | 0   | 0 | 0 | 0 | 0 | 0         | 45    |

D. Oxacillin, *S. aureus*, *S. lugdunensis* and *S. saprophyticus*.

|            |       | VITEK®2     |     |   |   |           |       |
|------------|-------|-------------|-----|---|---|-----------|-------|
|            |       | Susceptible |     |   |   | Resistant |       |
|            |       | ≤0.25       | 0.5 | 1 | 2 | >2        | Total |
| SpecifAST® | ≤0.25 | 6           | 3   | 0 | 0 | 0         | 9     |
|            | 0.5   | 0           | 1   | 0 | 0 | 0         | 1     |
|            | 1     | 1           | 0   | 0 | 0 | 0         | 1     |
|            | 2     | 0           | 0   | 0 | 0 | 0         | 0     |
|            | >2    | 1           | 0   | 0 | 0 | 0         | 1     |
|            | Total | 8           | 4   | 0 | 0 | 0         | 12    |

E. Oxacillin, coagulase negative staphylococci other than *S. lugdunensis* and *S. saprophyticus*.

|            |       | VITEK®2     |           |   |   |    |       |
|------------|-------|-------------|-----------|---|---|----|-------|
|            |       | Susceptible | Resistant |   |   |    |       |
|            |       | ≤0.25       | 0.5       | 1 | 2 | >2 | Total |
| SpecifAST® | ≤0.25 | 10          | 0         | 0 | 0 | 1  | 11    |
|            | 0.5   | 0           | 0         | 0 | 0 | 0  | 0     |
|            | 1     | 1           | 0         | 1 | 0 | 0  | 2     |
|            | 2     | 1           | 0         | 0 | 0 | 4  | 5     |
|            | >2    | 1           | 0         | 0 | 0 | 8  | 9     |
|            | Total | 13          | 0         | 1 | 0 | 13 | 27    |

F. Cefoxitin (6 mg/L), *Staphylococcus* spp.

|            |          | VITEK®2     |           |       |
|------------|----------|-------------|-----------|-------|
|            |          | Susceptible | Resistant |       |
|            |          | Negative    | Positive  | Total |
| SpecifAST® | Negative | 22          | 4         | 26    |
|            | Positive | 0           | 12        | 12    |
|            | Total    | 22          | 16        | 38    |

G. Vancomycin, *S. aureus*.

|            |       | VITEK®2     |   |   |           |   |    |     |       |
|------------|-------|-------------|---|---|-----------|---|----|-----|-------|
|            |       | Susceptible |   |   | Resistant |   |    |     |       |
|            |       | ≤0.5        | 1 | 2 | 4         | 8 | 16 | >16 | Total |
| SpecifAST® | ≤0.5  | 4           | 0 | 0 | 0         | 0 | 0  | 0   | 4     |
|            | 1     | 1           | 4 | 0 | 0         | 0 | 0  | 0   | 5     |
|            | 2     | 2           | 0 | 0 | 0         | 0 | 0  | 0   | 2     |
|            | 4     | 1           | 0 | 0 | 0         | 0 | 0  | 0   | 1     |
|            | 8     | 0           | 0 | 0 | 0         | 0 | 0  | 0   | 0     |
|            | 16    | 0           | 0 | 0 | 0         | 0 | 0  | 0   | 0     |
|            | >16   | 0           | 0 | 0 | 0         | 0 | 0  | 0   | 0     |
|            | Total | 8           | 4 | 0 | 0         | 0 | 0  | 0   | 12    |

H. Vancomycin, coagulase negative *Staphylococcus* spp.

|            |       | VITEK®2     |    |   |   |           |    |     |       |
|------------|-------|-------------|----|---|---|-----------|----|-----|-------|
|            |       | Susceptible |    |   |   | Resistant |    |     |       |
|            |       | <=0.5       | 1  | 2 | 4 | 8         | 16 | >16 | Total |
| SpecifAST® | <=0.5 | 0           | 1  | 0 | 0 | 0         | 0  | 0   | 1     |
|            | 1     | 6           | 3  | 1 | 0 | 0         | 0  | 0   | 10    |
|            | 2     | 3           | 3  | 1 | 0 | 0         | 0  | 0   | 7     |
|            | 4     | 3           | 3  | 2 | 0 | 0         | 0  | 0   | 8     |
|            | 8     | 0           | 0  | 1 | 0 | 0         | 0  | 0   | 1     |
|            | 16    | 0           | 0  | 0 | 0 | 0         | 0  | 0   | 0     |
|            | >16   | 0           | 0  | 0 | 0 | 0         | 0  | 0   | 0     |
|            | Total | 12          | 10 | 5 | 0 | 0         | 0  | 0   | 27    |

I. Ampicillin, *Enterococcus* spp.

|            |       | VITEK®2     |   |   |           |     |       |
|------------|-------|-------------|---|---|-----------|-----|-------|
|            |       | Susceptible |   | I | Resistant |     |       |
|            |       | <=2         | 4 | 8 | 16        | >16 | Total |
| SpecifAST® | <=2   | 1           | 0 | 0 | 0         | 0   | 1     |
|            | 4     | 2           | 0 | 0 | 0         | 0   | 2     |
|            | 8     | 1           | 0 | 0 | 0         | 0   | 1     |
|            | 16    | 0           | 0 | 0 | 0         | 0   | 0     |
|            | >16   | 0           | 0 | 0 | 0         | 5   | 5     |
|            | Total | 4           | 0 | 0 | 0         | 5   | 9     |

J. Vancomycin, *Enterococcus* spp.

|            |       | VITEK®2     |   |   |   |           |    |     |       |
|------------|-------|-------------|---|---|---|-----------|----|-----|-------|
|            |       | Susceptible |   |   |   | Resistant |    |     |       |
|            |       | <=0.5       | 1 | 2 | 4 | 8         | 16 | >16 | Total |
| SpecifAST® | <=0.5 | 5           | 0 | 0 | 0 | 0         | 0  | 0   | 5     |
|            | 1     | 1           | 3 | 0 | 0 | 0         | 0  | 0   | 4     |
|            | 2     | 0           | 0 | 0 | 0 | 0         | 0  | 0   | 0     |
|            | 4     | 0           | 0 | 0 | 0 | 0         | 0  | 0   | 0     |
|            | 8     | 0           | 0 | 0 | 0 | 0         | 0  | 0   | 0     |
|            | 16    | 0           | 0 | 0 | 0 | 0         | 0  | 0   | 0     |
|            | 32    | 0           | 0 | 0 | 0 | 0         | 0  | 1   | 1     |
|            | >32   | 0           | 0 | 0 | 0 | 0         | 0  | 0   | 0     |
|            | Total | 6           | 3 | 0 | 0 | 0         | 0  | 1   | 10    |

Interpretation of susceptibility test results according to EUCAST 2021 clinical breakpoints. Categorical agreement (green) Minor errors (orange) Major and very major errors (red). ATU: Area of technical uncertainty; I: Susceptible, increased exposure.

**Table S4.** Sensitivity and specificity of SpecifAST® method compared to VITEK®2.

| <b>Gram negatives</b> | <b>Sensitivity (95%-CI)</b> | <b>Specificity (95%-CI)</b> | <b>Resistance prevalence</b> |
|-----------------------|-----------------------------|-----------------------------|------------------------------|
| Ciprofloxacin         | 100%                        | 100%                        | 9/45 (20%)                   |
| Cefotaxim             | 100%                        | 100%                        | 7/46 (19%)                   |
| Meropenem             | 100%                        | 100%                        | 0/46 (0%)                    |
| <b>Gram positives</b> |                             |                             |                              |
| Ampicillin            | 100%                        | 75% (32.6 - 117.4)          | 8/12 (66.7%)                 |
| Oxacillin             | 92.9% (78.9 – 106.9)        | 85.7% (71.7 – 99.7)         | 14/42 (33.3%)                |
| Cefoxitin             | 75% (53.8 - 96.2)           | 100%                        | 16/41 (39.0%)                |
| Vancomycin            | 100%                        | 96.2% (91.0 - 101.4)        | 1/53 (1.9%)                  |
| <b>Mean</b>           | 91% (83.1 - 98.9)           | 97% (94.8 – 99.2)           | 55/285 (19.3%)               |

Sensitivity and specificity with corresponding 95% confidence intervals, and resistance prevalence. CI: Confidence interval.
